# Supplementary material for: Timing of Umbilical Cord Clamping – Attitudes and Beliefs among Midwives, Obstetricians, and Neonatologists
Source: Research Square preprint supplement (doi:10.21203/rs.3.rs-5412191/v1), 2024-12-16
Supplement: Supplementary file 1 [file 2c8014af36154f9e2aa346e5.xlsx]

## Sheet: Blad1
Characteristics of respondents (n)		N (%)	N(%)
Occupation and education level (838)
Obstetric physician		114 (13.6)
	Obstetrician		83 (72.8)
	Obstetric resident		31 (27.2)
Pediatric physician		121 (14.4)
	Neonatologist or Neonatal fellow		41 (33.9)
	Pediatrician		44 (36.4)
	Pediatric resident		36 (29.8)
Midwife		368 (43.9)
Assistant nurse delivery ward		89 (10.6)
Nurse		109 (13.0)
	Nurse specialized in pediatric care		75 (68.8)
	General nurse		34 (31.2)
Assistant nurse neonatal ward		37 (4.4)
Age (824)
20-35 years of age		254 (30.8)
36-50 years of age		349 (42.4)
51-65 years of age		207 (24.7)
> 65 years of age		14 (1.7)
Years of working experience (758)
0-5 years		269 (35.5)
6-10 years		151 (19.9)
11-20 years		174 (20.8)
> 20 years		164 (19.6)
NICU level1 (838)
Level 1		94 (11.2)
Level 2		500 (59.7)
Level 3		244 (29.1)
Region of practice (838)
Northern region		45 (5.4)
Middle region		216 (25.8)
Eastern region		154 (18.4)
Southeast region		57 (6.8)
Western region		105 (12.5)
Southern region		261 (31.1)
Employee in an unit participating in the SAVE-study (838)		335 (40.0)
